# Supplementary material for: Genomic Analysis of Adaptation of the MRSA ST239 Strains to the Development of Various Types of the Infectious Process
Source: Preprints.org preprint supplement (doi:10.20944/preprints202211.0039.v1), 2022-11-02
Supplement: Supplementary file 13 [file 7 Supplementary Table S7 PSM.docx]

Supplementary Table S7. *Staphylococcus aureus* PSM peptides amino acid sequence.

| Strain | Peptide accession number / number of amino acids (aa) | | | | | |
| --- | --- | --- | --- | --- | --- | --- |
| Alpha-1/21aa | Alpha-2/21aa | Alpha-3/22aa | Alpha-4/20aa | Beta-1/44aa | Beta-2/44aa |
| NCTC 8325 | P0C7Y1.1 | P0C7Z3.1 | P0C805.1 | n/d | WP_000147103.1 | Wp_000398672.1 |
| Newman | WP_014373781.1 | WP_014373780.1 | WP_014373779.1 | WP_014532416.1 | WP_000147103.1 | Wp_000398672.1 |
| Col | WP_014373781.1 | WP_014373780.1 | WP_014373779.1 | WP_014532416.1 | WP_000147103.1 | Wp_000398672.1 |
| FPR3757 | WP_014373781.1 | WP_014373780.1 | WP_014373779.1 | WP_014532416.1 | [WP_000147103.1](https://www.ncbi.nlm.nih.gov/protein/WP_000147103.1) | Wp_000398672.1 |
| N315 | WP_014373781.1 | WP_014373780.1 | WP_014373779.1 | WP_014532416.1 | WP_000147103.1 | Wp_000398672.1 |
| MW2 | WP_014373781.1 | WP_014373780.1 | WP_014373779.1 | WP_014532416.1 | WP_000147103.1 | Wp_000398672.1 |
| MRSA252 | Wp_014373781.1 | WP_014373780.1 | WP_099119694.1 | WP_014532416.1 | n/d | Wp_000398672.1 |
| T0131 | WP_014373781.1 | WP_014373780.1 | WP_014373779.1 | WP_014532416.1 | WP_000147103.1 | Wp_000398672.1 |
| 55/2053 | WP_014373781.1 | WP_014373780.1 | n/d | n/d | n/d | n/d |
| TW20 | WP_014373781.1 | WP_014373780.1 | WP_014373779.1 | WP_014532416.1 | WP_000147103.1 | Wp_000398672.1 |
| Z172 | WP_014373781.1 | WP_014373780.1 | WP_014373779.1 | WP_014532416.1 | WP_000147103.1 | n/d |
| V521 | n/d | n/d | n/d | n/d | n/d | n/d |
| Bmb9393 | WP_014373781.1 | WP_014373780.1 | WP_014373779.1 | n/d | WP_000147103.1 | Wp_000398672.1 |
| Be62 | n/d | n/d | n/d | n/d | n/d | n/d |
| JKD6008 | [WP_014373781.1](https://www.ncbi.nlm.nih.gov/protein/WP_014373781.1) | Wp_014373780.1 | Wp_14373779.1 | Wp_014532416.1 | Wp_000147103.1 | Wp_000398672.1 |
| SA943 | RAM45730.1 | RAM45731.1 | RAM45732.1 | RAM45733.1 | RAM45753.1 | RAM45754.1 |

Supplementary Table S7. *Staphylococcus aureus* PSM peptides amino acid sequence (continued).

| Strain | Peptide accession number / number of amino acids (aa) | | | | | |
| --- | --- | --- | --- | --- | --- | --- |
| Delta-lysin/44aa | PSM-mec/22aa | Transport proteins for PSM peptides | | | | |
| PmtA/298 aa | PmtB/226 aa | PmtC/240 aa | PmtD/246 aa | |
| NCTC8325 | WP_001549197.1 | no | WP_000991302.1 | WP_000645727.1 | WP_000763048.1 | WP_001221651.1 | |
| Newman | WP_001549197.1 | no | WP_000991302.1 | WP_000645727.1 | WP_000763048.1 | WP_001221651.1 | |
| Col | WP_001549197.1 | no | WP_000991302.1 | WP_000645727.1 | WP_000763048.1 | [WP_001221651.1](https://www.ncbi.nlm.nih.gov/protein/447144395) | |
| FPR3757 | WP_001549197.1 | no | WP_000991302.1 | WP_000645727.1 | WP_000763048.1 | WP_001221651.1 | |
| N315 | WP_001549197.1 | WP_014532405.1 | [WP_000991306.1](https://www.ncbi.nlm.nih.gov/protein/446914050) | WP_000645727.1 | [WP_000763043.1](https://www.ncbi.nlm.nih.gov/protein/446685697) | WP_001221651.1 | |
| MW2 | [WP_001823225.1](https://www.ncbi.nlm.nih.gov/protein/487739646) | no | n/d | n/d | WP_000763048.1 | [WP_001221657.1](https://www.ncbi.nlm.nih.gov/protein/447144401) | |
| MRSA252 | CAG41103.1  (45aa) | WP_014532405.1 | n/d | n/d | WP_000763048.1 | n/d | |
| T0131 | WP_001549197.1 | WP_014532405.1 | [WP_000991302.1](https://www.ncbi.nlm.nih.gov/protein/446914046) | WP_000645727.1 | WP_000763048.1 | WP_001221651.1 | |
| 55/2053 | WP_001549197.1 | no | n/d | n/d | WP_000763048.1 | n/d | |
| TW20 | WP_001549197.1 | WP_014532405.1 | WP_000991302.1 | WP_000645727.1 | WP_000763048.1 | WP_001221651.1 | |
| Z172 | WP_001549197.1 | WP_014532405.1 | WP_000991302.1 | WP_000645727.1 | WP_000763048.1 | WP_001221651.1 | |
| V521 | n/d | n/d | n/d | n/d | n/d | n/d | |
| Bmb9393 | WP_001549197.1 | WP_014532405.1 | WP_000991302.1 | WP_000645727.1 | WP_000763048.1 | WP_001221651.1 | |
| Be62 | n/d | n/d | n/d | n/d | n/d | n/d | |
| JKD6008 | WP_001549197.1 | WP_014532405.1 | WP_000991302.1 | WP_000645727.1 | WP_000763048.1 | WP_001221651.1 | |
| SA943 | RAM45554.1 | RAM45233.1 | RAM45801.1 | RAM45802.1 | RAM45803.1 | RAM45804.1 | |
